# Supplementary material
Source: PubMed Central journal article supplement (PMC7006960)

## SUPPORTING INFORMATION

### Spatially Offset and Transmission Raman Spectroscopy for Determination of Depth of Inclusion in Turbid Matrix

Sara Mosca<sup>a</sup>, Priyanka Dey<sup>b</sup>, Tanveer A. Tabish<sup>b</sup>, Francesca Palombo<sup>b</sup>, Nicholas Stone<sup>b\*</sup> and Pavel Matousek<sup>a\*</sup>

<sup>a</sup> Central Laser Facility, Research Complex at Harwell, STFC Rutherford Appleton Laboratory, UK Research and Innovation, Harwell Campus Oxford OX11 0QX, United Kingdom

<sup>b</sup> School of Physics and Astronomy, University of Exeter, Exeter EX4 4QL, United Kingdom

\*Corresponding authors

#### AUTHOR INFORMATION

##### Corresponding Author

\* Nick Stone: [N.Stone@exeter.ac.uk](mailto:N.Stone@exeter.ac.uk)

\* Pavel Matousek: [pavel.matousek@stfc.ac.uk](mailto:pavel.matousek@stfc.ac.uk)

#### Table of content:

- |                                           |     |
|-------------------------------------------|-----|
| 1. Raman intensities of paracetamol peaks | S-2 |
| 2. Calibration curve                      | S-4 |

## 1. Raman intensities of paracetamol peaks

The absolute Raman intensity of the paracetamol peaks ( $857\text{ cm}^{-1}$  black,  $1235\text{ cm}^{-1}$  red) at depth in the PE matrix collected with a SORS spatial offset  $SO = 1$  to  $12\text{ mm}$  and with TRS geometry.

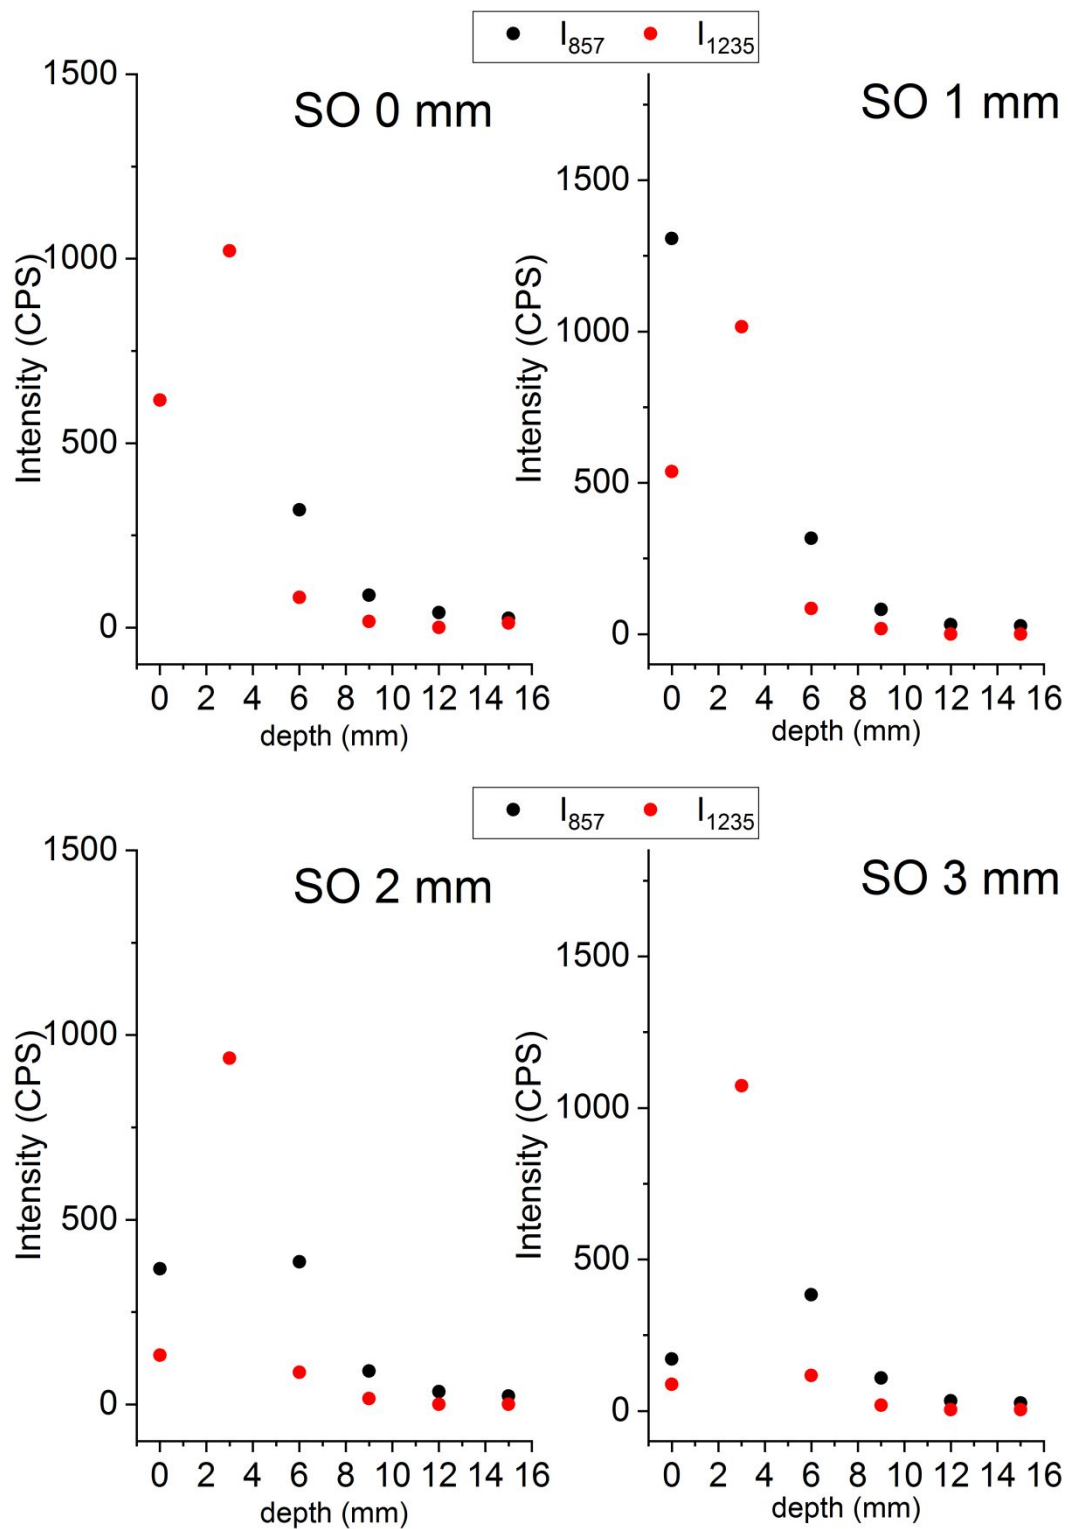

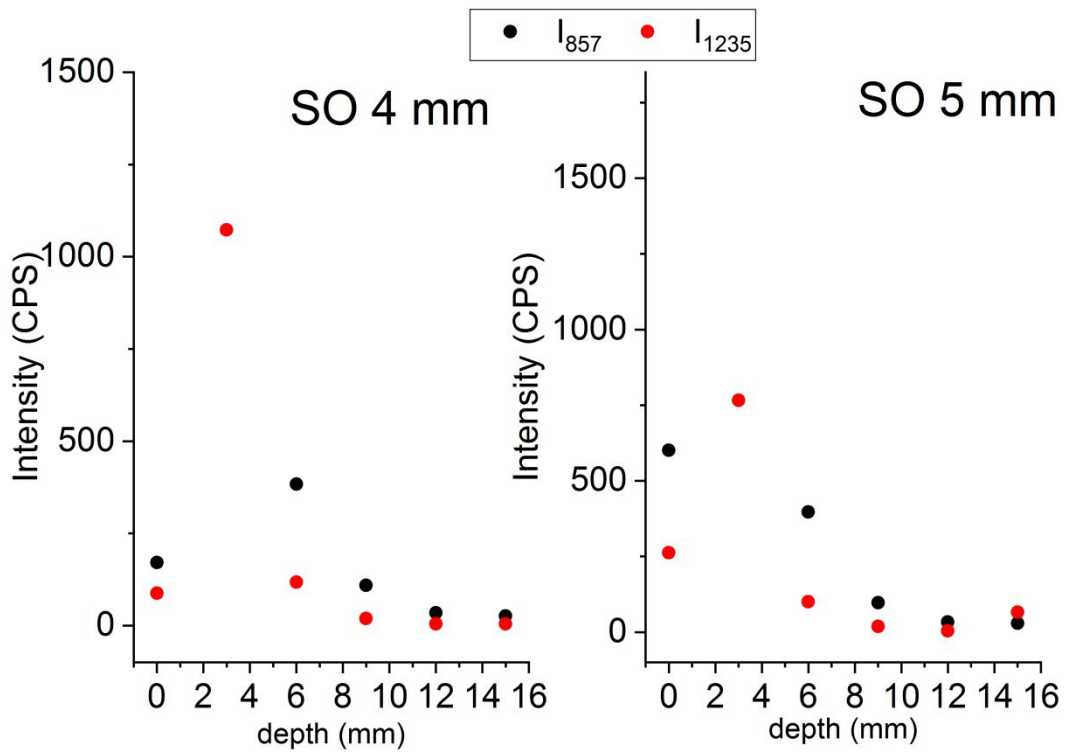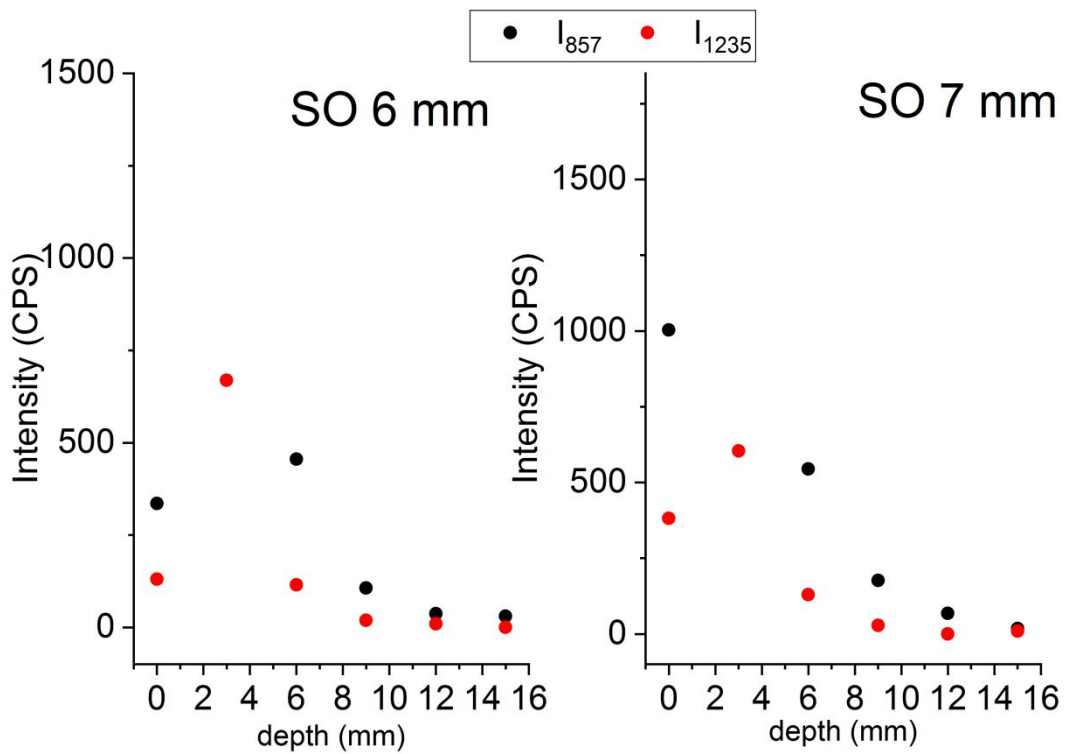

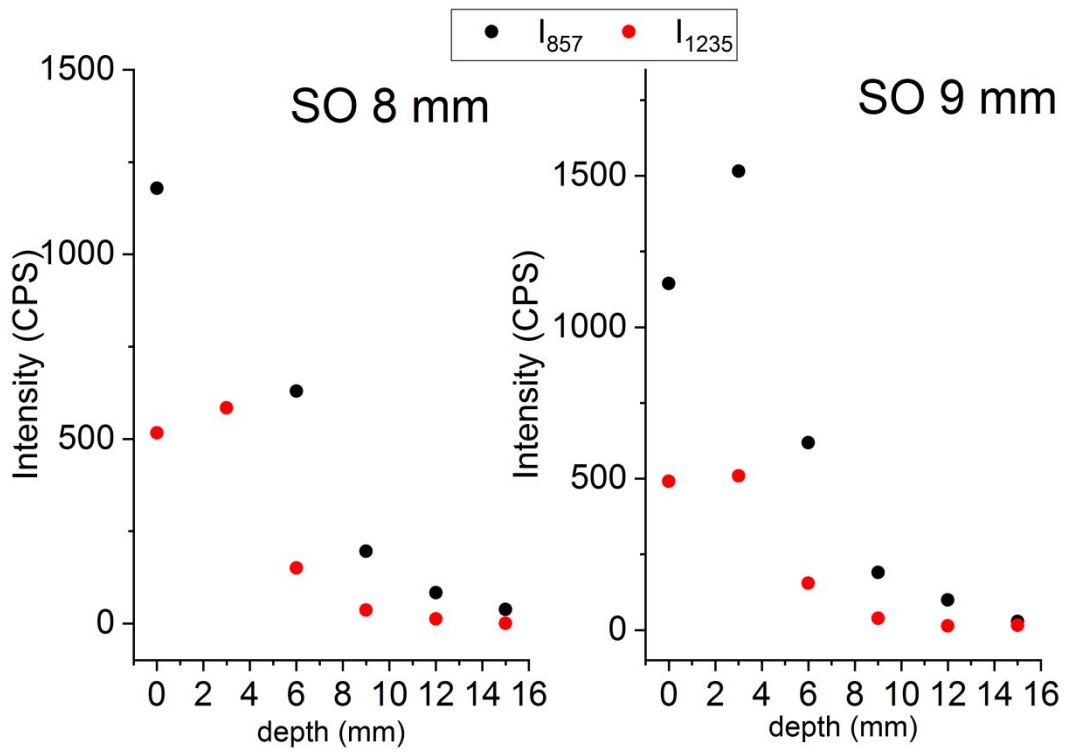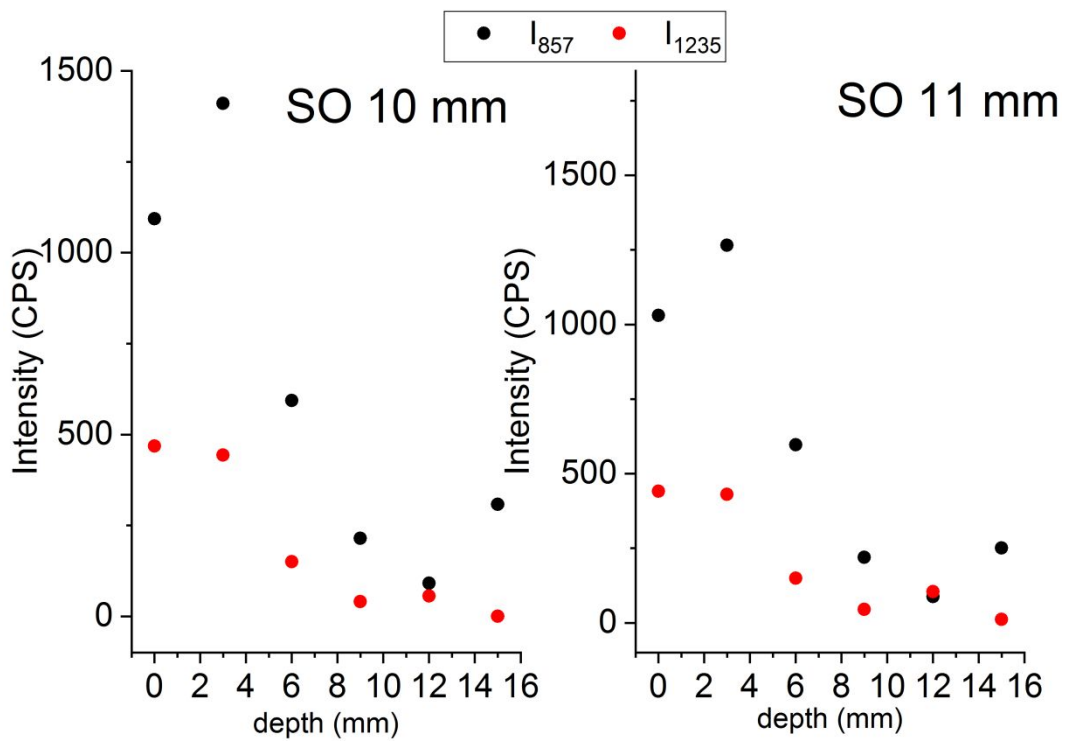

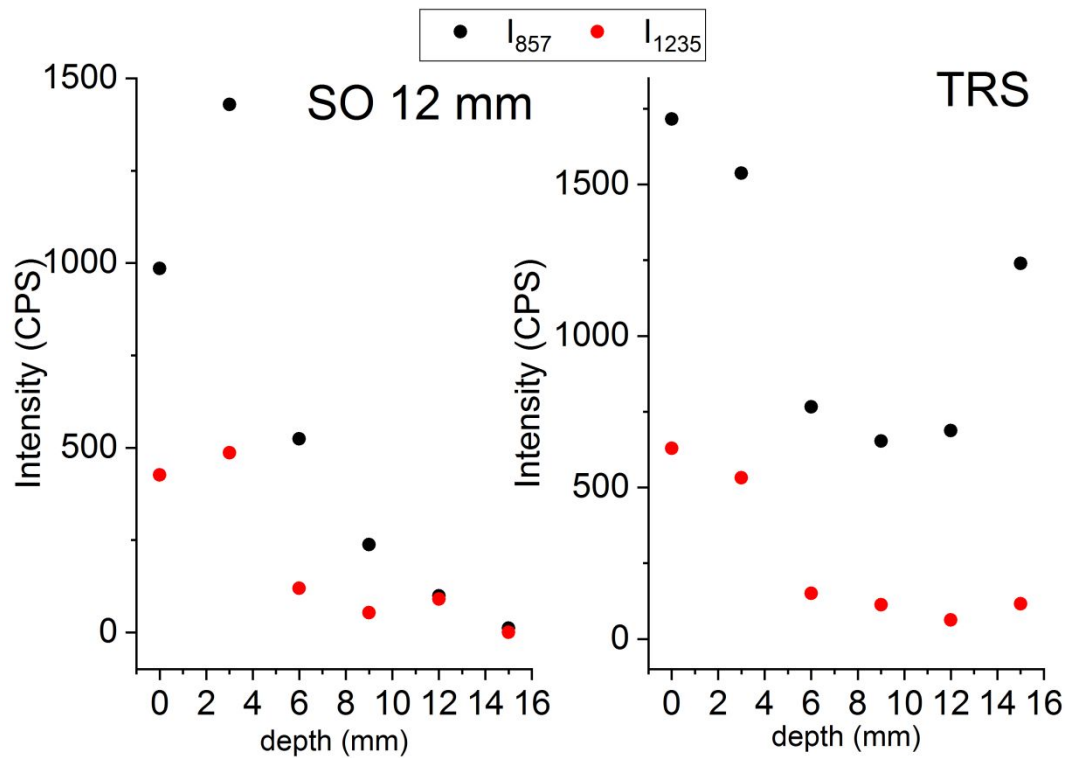

## 2. Calibration curve

Equations ( $y=a+ bx$ ) obtained by a linear fit of the natural logarithm of the 857-to-1235  $\text{cm}^{-1}$  ratio versus depth of inclusion in the turbid matrix. Standard error ( $\sigma$ ) and  $R^2$  statistical value are reported in column

| Spatial offset (mm) | a, Intercept |                            | b, Slope |                            | R <sup>2</sup>         |
|---------------------|--------------|----------------------------|----------|----------------------------|------------------------|
|                     | Value        | Standard Error( $\sigma$ ) | Value    | Standard Error( $\sigma$ ) | Regression coefficient |
| 0                   | 0.83603      | 0.07154                    | 0.0912   | 0.01275                    | 0.9436                 |
| 1                   | 0.85103      | 0.04551                    | 0.07556  | 0.00811                    | 0.96622                |
| 2                   | 0.83069      | 0.0467                     | 0.08361  | 0.00832                    | 0.97087                |
| 3                   | 0.76905      | 0.0892                     | 0.11714  | 0.01214                    | 0.95838                |
| 4                   | 0.78769      | 0.03348                    | 0.10097  | 0.00456                    | 0.99191                |
| 5                   | 0.86063      | 0.04533                    | 0.08525  | 0.00808                    | 0.97355                |
| 6                   | 0.81843      | 0.05501                    | 0.09521  | 0.0098                     | 0.96886                |
| 7                   | 0.80387      | 0.09048                    | 0.10513  | 0.01231                    | 0.9473                 |
| 8                   | 0.8229       | 0.02803                    | 0.09477  | 0.00381                    | 0.99355                |
| 9                   | 0.82701      | 0.0379                     | 0.09149  | 0.00516                    | 0.98741                |
| 10                  | 0.87332      | 0.02462                    | 0.08477  | 0.00335                    | 0.99378                |
| 11                  | 0.84645      | 0.02397                    | 0.0836   | 0.00427                    | 0.99221                |
| 12                  | 0.85303      | 0.07976                    | 0.08372  | 0.01085                    | 0.94599                |
| TRS                 | 0.8586       | 0.09112                    | 0.1142   | 0.01003                    | 0.96257                |

Natural logarithm of the 857-to-1235  $\text{cm}^{-1}$  ratio of paracetamol peaks (black squares), with linear fit (black line) used as a calibration curve for the creation of model

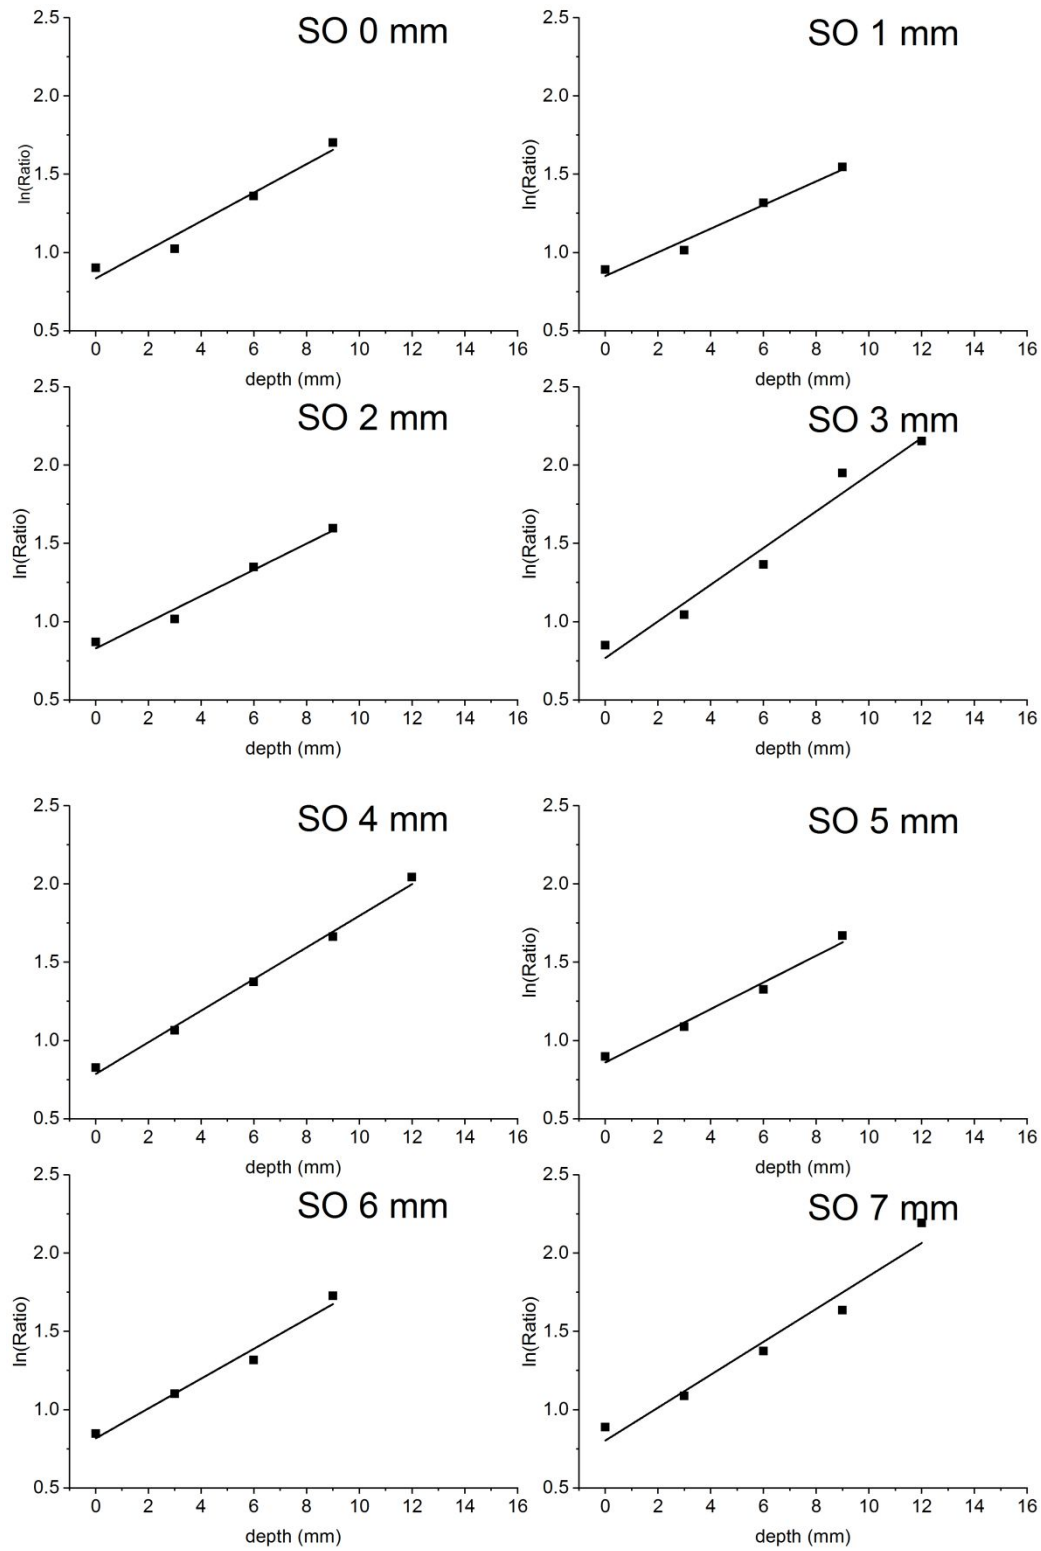

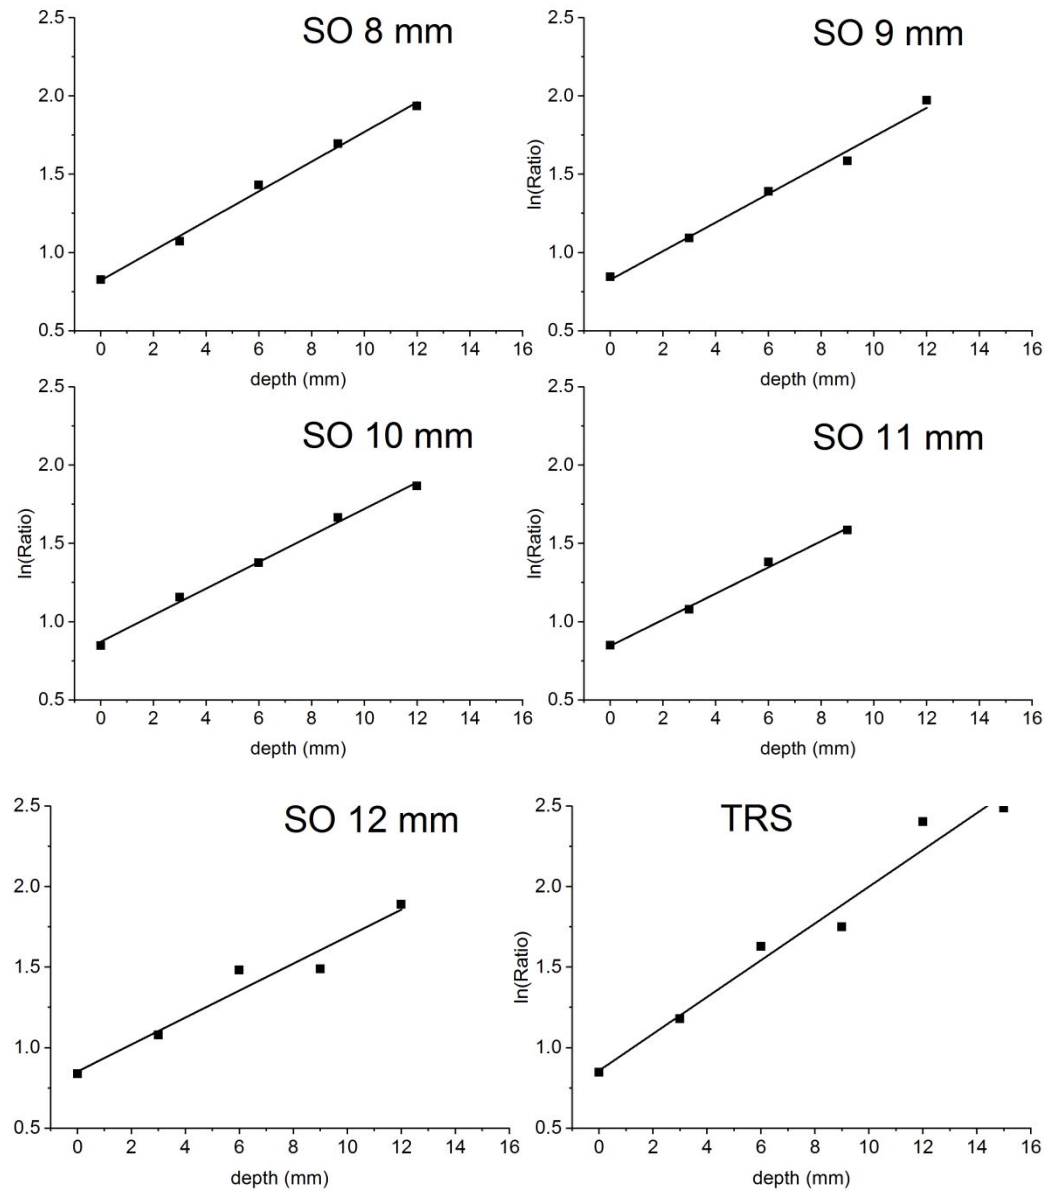

Supplement: ac9b01222_si_001.pdf [file ac9b01222_si_001.pdf]
